# Supplementary material for: Molecular basis of differential target regulation by miR-96 and miR-182: the Glypican-3 as a model
Source: PubMed Central journal article supplement — Nucleic Acids Res. 2011 Oct 18;40(3):1356–65. doi: 10.1093/nar/gkr843 (PMC3273822; doi:10.1093/nar/gkr843), 2011-10-18
Supplement: supp_gkr843_nar-01349-c-2011-File003.pdf [file supp_gkr843_nar-01349-c-2011-File003.pdf]

## Supplementary Information

Supplementary Table 1 : Primers used in Real time quantitative PCR amplifications.

| Target            | DNA template | Forward primer             | Reverse primer             |
|-------------------|--------------|----------------------------|----------------------------|
| 18s ribosomal RNA | cDNA         | 5'-GCCATGCATGTCTGAGTACG-3' | 5'-CCGTCGGCATGTATTAGCTC-3' |
| FOXO1 mRNA        | cDNA         | 5'-AAGAGCGTGCCCTACTTCAA-3' | 5'-CTGTTGTTGTCCATGGATGC-3' |
| ADCY6 mRNA        | cDNA         | 5'-AGGCAAACAATGAGGGTGTC-3' | 5'-CGCTCCTCGCTGATAATCTC-3' |
| AGO1 mRNA         | cDNA         | 5'-ACAAGTCCACCCGTTTCAAG-3' | 5'-ATCCCAGGCTGGTAGTCCTT-3' |
| AGO2 mRNA         | cDNA         | 5'-TGTGTACCGAGTGGGATTCA-3' | 5'-TTTAAAATCTGGGACGGAAG-3' |
| AGO3 mRNA         | cDNA         | 5'-AGTGAACAGGGAGGTGGTTG-3' | 5'-AGTGGATTGGCGGTGTAAAG-3' |
| AGO4 mRNA         | cDNA         | 5'-GCAAATCCACCATGATACCC-3' | 5'-GCGGTAGGCATTTGAAACAT-3' |
| GPC3 mRNA         | cDNA         | 5'-AACTCCGAAGGACAACGAGA-3' | 5'-GCACCAGGAAGAAGAAGCAC-3' |

Supplementary Table 2 : Sequence of synthetic double-stranded small RNAs

| miRNA           | Guide strand                   | Passenger strand            |
|-----------------|--------------------------------|-----------------------------|
| Hsa-miR-96 8mer | 5'-UUUGGCAC-3'                 | 5'-GUGCCAAA-3'              |
| Hsa-miR-182     | 5'-UUUGGCAAUGGUAGAACUCACACU-3' | 5'-UGGUUCUAGACUUGCCAACUA-3' |
| Hsa-miR-182mut  | 5'-UUUGGCACUGGUAGAACUCACACU-3' | 5'-UGGUUCUAGACGUGCCAACUA-3' |
| Hsa-miR-96      | 5'-UUUGGCACUAGCACAUUUUUGCU-3'  | 5'-AAUCAUGUGCAGUGCCAUAUG-3' |
| Hsa-miR-96mut   | 5'-UUUGGCAAUAGCACAUUUUUGCU-3'  | 5'-AAUCAUGUGCAUUGCCAUAUG-3' |

## Supplementary Figure Legends:

Supplementary Figure S1: miRNA:GPC3 predictions using Targetscan (Panel A) (1), Diana microT v.4 (Panel B) (2), miRanda/mirSVR (Panel C) (3), PITA (Panel D) (4), Pictar (Panel E) (5) and miRDB (Panel F) (6, 7) algorithms.

Supplementary Figure S2: Panel A: Location and ribonucleic sequence of miR-96/182 site in the GPC3 3'UTR and conservation amongst species (Targetscan predictions; (1)). The predicted site recognized by each miRNA 5'-end is shown in a white box. Panel B: Table summarizing the relative expression of miR-96 and miR-182 in HuH7 and SNU398 cells. Panel C: Amplification plots (in triplicate) of miR-182 using reverse-transcribed RNA from HuH7 cells transfected with the small RNA control siLuc or miR-182 as shown. Panel D: Relative expression of ADCY6 mRNA (left panel; ANOVA:  $p < 0.0001$ ;  $n=3$ ) and protein (right panel; representative of two independent experiments) measured in HuH7 cells transfected with the small RNA control siLuc, miR-96 or miR-182 as shown. Left panel:.

Supplementary Figure S3: Panel A: eGFP-GPC3-expressing SNU398 cells were transfected with the indicated small RNAs. Three days later, eGFP protein expression was analyzed by FACS following the FunREG pipeline (see Figure 2B; ANOVA:  $p < 0.0001$ ;  $n=4$ ). Panel B: eGFP-GPC3-expressing HuH7 cells were transfected with the indicated concentrations of miR-96. Three days later, the amounts of eGFP protein was analyzed as described in Panel A ( $n=3$ ). Panels C to F: Relative expression of the corresponding Argonaute mRNAs measured in HuH7 cells transfected with the indicated small RNAs (ANOVA as indicated,  $n=3$ ). \*:  $p < 0.05$ ; \*\*\*:  $p < 0.001$ .

Supplementary Figure S4: Relative expression of FOXO1 mRNA measured in HuH7 cells transfected with the indicated small RNA (ANOVA:  $p < 0.0001$ ;  $n=3$ ). \*\*\*:  $p < 0.001$ .

## Supplementary references

1. Grimson, A., Farh, K. K., Johnston, W. K., Garrett-Engele, P., Lim, L. P., and Bartel, D. P. (2007) MicroRNA targeting specificity in mammals: determinants beyond seed pairing, *Mol Cell* 27, 91-105.
2. Maragkakis, M., Reczko, M., Simossis, V. A., Alexiou, P., Papadopoulos, G. L., Dalamagas, T., Giannopoulos, G., Goumas, G., Koukis, E., Kourtis, K., Vergoulis, T., Koziris, N., Sellis, T., Tsanakas, P., and Hatzigeorgiou, A. G. (2009) DIANA-microT web server: elucidating microRNA functions through target prediction, *Nucleic Acids Res* 37, W273-276.
3. Betel, D., Koppal, A., Agius, P., Sander, C., and Leslie, C. (2010) Comprehensive modeling of microRNA targets predicts functional non-conserved and non-canonical sites, *Genome Biol* 11, R90.
4. Kertesz, M., Iovino, N., Unnerstall, U., Gaul, U., and Segal, E. (2007) The role of site accessibility in microRNA target recognition, *Nat Genet* 39, 1278-1284.
5. Krek, A., Grun, D., Poy, M. N., Wolf, R., Rosenberg, L., Epstein, E. J., MacMenamin, P., da Piedade, I., Gunsalus, K. C., Stoffel, M., and Rajewsky, N. (2005) Combinatorial microRNA target predictions, *Nat Genet* 37, 495-500.
6. Wang, X. (2008) miRDB: a microRNA target prediction and functional annotation database with a wiki interface, *Rna* 14, 1012-1017.
7. Wang, X., and El Naqa, I. M. (2008) Prediction of both conserved and nonconserved microRNA targets in animals, *Bioinformatics* 24, 325-332.

A

## Targetscan

### Human GPC3 3' UTR miRNA Table

Table sorted by total context score [Sort table by aggregate P<sub>CT</sub>]

#### miRNA families broadly conserved among vertebrates

| miRNA                 | conserved sites |      |         |         | poorly conserved sites |      |         |         | Total Context score | Aggregate P <sub>CT</sub> |
|-----------------------|-----------------|------|---------|---------|------------------------|------|---------|---------|---------------------|---------------------------|
|                       | Total           | 8mer | 7mer-m8 | 7mer-1A | Total                  | 8mer | 7mer-m8 | 7mer-1A |                     |                           |
| miR-98/1271           | 1               | 1    | 0       | 0       | 0                      | 0    | 0       | 0       | -0.49               | 0.80                      |
| miR-204/211           | 1               | 1    | 0       | 0       | 0                      | 0    | 0       | 0       | -0.41               | 0.15                      |
| miR-140/140-5p/876-3p | 0               | 0    | 0       | 0       | 1                      | 0    | 1       | 0       | -0.24               | < 0.1                     |
| miR-182               | 0               | 0    | 0       | 0       | 1                      | 0    | 0       | 1       | -0.20               | 0.51                      |
| miR-15/16/195/424/497 | 0               | 0    | 0       | 0       | 1                      | 0    | 0       | 1       | -0.18               | < 0.1                     |
| miR-503               | 0               | 0    | 0       | 0       | 1                      | 0    | 0       | 1       | -0.18               | < 0.1                     |
| miR-7/7ab             | 0               | 0    | 0       | 0       | 1                      | 0    | 1       | 0       | -0.14               | 0.14                      |

#### miRNA families conserved only among mammals

| miRNA          | conserved sites |      |         |         | poorly conserved sites |      |         |         | Total Context score | Aggregate P <sub>CT</sub> |
|----------------|-----------------|------|---------|---------|------------------------|------|---------|---------|---------------------|---------------------------|
|                | Total           | 8mer | 7mer-m8 | 7mer-1A | Total                  | 8mer | 7mer-m8 | 7mer-1A |                     |                           |
| miR-202/202-3p | 0               | 0    | 0       | 0       | 1                      | 0    | 1       | 0       | -0.21               | < 0.1                     |
| miR-495/1192   | 0               | 0    | 0       | 0       | 1                      | 0    | 0       | 1       | -0.15               | < 0.1                     |

#### Poorly conserved miRNA Families

| miRNA            | conserved sites |      |         |         | poorly conserved sites |      |         |         | Total Context score | Aggregate P <sub>CT</sub> |
|------------------|-----------------|------|---------|---------|------------------------|------|---------|---------|---------------------|---------------------------|
|                  | Total           | 8mer | 7mer-m8 | 7mer-1A | Total                  | 8mer | 7mer-m8 | 7mer-1A |                     |                           |
| miR-765          | 1               | 1    | 0       | 0       | 0                      | 0    | 0       | 0       | -0.37               | < 0.1                     |
| miR-518a-5p/527  | 0               | 0    | 0       | 0       | 2                      | 0    | 1       | 1       | -0.36               | < 0.1                     |
| miR-570          | 0               | 0    | 0       | 0       | 1                      | 0    | 1       | 0       | -0.27               | < 0.1                     |
| miR-450b/450b-5p | 0               | 0    | 0       | 0       | 1                      | 0    | 1       | 0       | -0.25               | < 0.1                     |
| miR-1321         | 0               | 0    | 0       | 0       | 1                      | 0    | 1       | 0       | -0.23               | < 0.1                     |
| miR-607          | 0               | 0    | 0       | 0       | 1                      | 0    | 0       | 1       | -0.23               | < 0.1                     |
| miR-220c         | 0               | 0    | 0       | 0       | 1                      | 0    | 1       | 0       | -0.20               | < 0.1                     |
| miR-1305         | 0               | 0    | 0       | 0       | 1                      | 0    | 0       | 1       | -0.19               | < 0.1                     |
| miR-846          | 0               | 0    | 0       | 0       | 1                      | 0    | 0       | 1       | -0.17               | < 0.1                     |
| miR-151          | 0               | 0    | 0       | 0       | 1                      | 0    | 0       | 1       | -0.16               | < 0.1                     |
| miR-841          | 0               | 0    | 0       | 0       | 1                      | 0    | 1       | 0       | -0.15               | < 0.1                     |
| miR-811          | 0               | 0    | 0       | 0       | 1                      | 0    | 0       | 1       | -0.14               | < 0.1                     |
| miR-823          | 0               | 0    | 0       | 0       | 1                      | 0    | 0       | 1       | -0.12               | < 0.1                     |
| miR-140-3p       | 0               | 0    | 0       | 0       | 1                      | 0    | 1       | 0       | -0.11               | < 0.1                     |
| miR-812/1285     | 0               | 0    | 0       | 0       | 1                      | 0    | 1       | 0       | N/A                 | < 0.1                     |

B

## Diana microT v.4

The screenshot shows the Diana microT v.4 web interface. At the top, there is a navigation bar with 'DIANA LAB' and 'DNA Intelligent Analysis'. Below this are tabs for 'HOME', 'SOFTWARE', 'DATABASES', 'MEMBERS', 'PUBLICATIONS', and 'HELP'. A search bar contains the query 'ENSG00000147257' and a threshold is set to '0.45'. The results section displays '7 targets with miRNAs found in genes ENSG00000147257'. A table lists the following targets:

| Ensembl Gene Id          | miRNA name     | miTG score | SNR | Precision | Also Predicted                                    |
|--------------------------|----------------|------------|-----|-----------|---------------------------------------------------|
| 1 ENSG00000147257 (GPC3) | hsa-miR-96     | 0.593      | 6.8 | 0.8       | <input type="checkbox"/> <input type="checkbox"/> |
| 2 ENSG00000147257 (GPC3) | hsa-miR-202    | 0.503      | 6.2 | 0.8       | <input type="checkbox"/> <input type="checkbox"/> |
| 3 ENSG00000147257 (GPC3) | hsa-miR-186    | 0.497      | 1.7 | 0.4       | <input type="checkbox"/> <input type="checkbox"/> |
| 4 ENSG00000147257 (GPC3) | hsa-miR-1271   | 0.495      | 3.0 | 0.6       | <input type="checkbox"/> <input type="checkbox"/> |
| 5 ENSG00000147257 (GPC3) | hsa-miR-182    | 0.495      | 5.2 | 0.8       | <input type="checkbox"/> <input type="checkbox"/> |
| 6 ENSG00000147257 (GPC3) | hsa-miR-765    | 0.470      | 0.6 | 0.2       | <input type="checkbox"/> <input type="checkbox"/> |
| 7 ENSG00000147257 (GPC3) | hsa-miR-140-3p | 0.460      | 1.5 | 0.3       | <input type="checkbox"/> <input type="checkbox"/> |

Jalvy S et al, Supplementary Figure S1

## C miRanda/mirSVR

**hsa-miR-182/GPC3 Alignment**

```

3' ucacacucaagaugguaACGGUUu 5' hsa-miR-182
      |||||
233:5' aaaaaaccucaaguuGOCaAa 3' GPC3
  
```

mirSVR score: -0.4984  
PhastCons score: 0.6883

Mouseover a miRNA mature name to see the miRNA/GPC3 alignment.

**hsa-miR-96/GPC3 Alignment**

```

3' ucgUUUU--DACACGADCAAGUUu 5' hsa-miR-96
      |||||
232:5' aaaaaaaCCAUCAAAGUUGGCCAAa 3' GPC3
  
```

mirSVR score: -1.3238  
PhastCons score: 0.6883

Mouseover a miRNA mature name to see the miRNA/GPC3 alignment.

**GPC3 glypican 3**

```

                                     miR-519d
                                     miR-93
                                     miR-17
                                     miR-106b
                                     miR-106a
                                     miR-140-3p
                                     miR-211 miR-20b
                                     miR-7  miR-204 miR-20a
1  CUGCCUGGUGCCGACACAUUGUGCCUACAGCACCUGUGGUCUUCUGAUAAAAGGGAACCACUUUCUUAU 75

                                     miR-495  miR-202
76 UUUUUUCUAUUUUUUUUUUUUUUUUAUCCUGUADACCUCUCCAGCAUGAAGUAGAGGACUAACCAUGUGUUAU 150

181 GUUUUCGAAAAUCAAAUGGUAUUCUUUUGGAGGAAGAUACAUUUUAGUGUGUAGCAUAUAGAUAUGUCCUUUUGCAAA 226

                                     miR-182
                                     miR-96
226 GAAAGAAAAAAAACCAUCAAGUUGGCCAAAUUAUUCUCCUAUGUUUGGUCUAGAACAUUGUUAUACCAUUGUCUU 200

                                     miR-1271
301 UCUCUCUCACUCCUCCUUCUUCUUGUUUCUCUUUGCAUGGAUUUUUGAAAAAAAUAUUUUGUCUCAAUA 275

376 A 376
  
```

## D PITA

Predicted Sites

| Gene            | microRNA        | Position | Seed  | dGduplex | dGopen | ddG    |
|-----------------|-----------------|----------|-------|----------|--------|--------|
| Human_GPC3_3UTR | hsa-miR-765     | 112      | 7:0:0 | -18.5    | -2.27  | -16.22 |
| Human_GPC3_3UTR | hsa-miR-1321    | 313      | 7:0:0 | -17.8    | -3.20  | -14.59 |
| Human_GPC3_3UTR | hsa-miR-518a-5p | 334      | 7:0:0 | -14.9    | -2.53  | -12.36 |
| Human_GPC3_3UTR | hsa-miR-527     | 334      | 7:0:0 | -14.9    | -2.53  | -12.36 |
| Human_GPC3_3UTR | hsa-miR-202     | 107      | 8:0:0 | -15.6    | -5.77  | -9.82  |
| Human_GPC3_3UTR | hsa-miR-96      | 249      | 7:0:0 | -15.2    | -7.57  | -7.62  |
| Human_GPC3_3UTR | hsa-miR-220c    | 37       | 7:0:0 | -22.2    | -15.36 | -6.83  |
| Human_GPC3_3UTR | hsa-miR-204     | 56       | 7:0:0 | -17.54   | -11.32 | -6.21  |
| Human_GPC3_3UTR | hsa-miR-211     | 56       | 7:0:0 | -17.54   | -11.32 | -6.21  |
| Human_GPC3_3UTR | hsa-miR-140-3p  | 38       | 8:0:0 | -21.17   | -15.34 | -5.82  |
| Human_GPC3_3UTR | hsa-miR-140-5p  | 62       | 7:0:0 | -14.62   | -9.06  | -5.55  |
| Human_GPC3_3UTR | hsa-miR-450b-5p | 219      | 7:0:0 | -11.71   | -6.26  | -5.44  |
| Human_GPC3_3UTR | hsa-miR-1271    | 249      | 7:0:0 | -12.65   | -7.57  | -5.07  |
| Human_GPC3_3UTR | hsa-miR-570     | 150      | 7:0:0 | -13.7    | -9.41  | -4.28  |
| Human_GPC3_3UTR | hsa-miR-641     | 294      | 7:0:0 | -13.3    | -9.70  | -3.59  |
| Human_GPC3_3UTR | hsa-miR-7       | 44       | 7:0:0 | -17.6    | -14.48 | -3.11  |

## E

## Pictar

| Predicted miRNAs | Pictar Score |
|------------------|--------------|
| Hsa-miR-369-3p   | 8.7245       |
| Hsa-miR-182      | 5.3604       |
| Hsa-miR-96       | 4.2667       |
| Hsa-miR-186      | 1.4920       |

## F

## miRDB

| Target Detail           | Target Rank | Target Score | miRNA Name      | Gene Symbol          | Gene Description |
|-------------------------|-------------|--------------|-----------------|----------------------|------------------|
| <a href="#">Details</a> | 1           | 69           | hsa-miR-1271    | <a href="#">GPC3</a> | glypican 3       |
| <a href="#">Details</a> | 2           | 69           | hsa-miR-450b-5p | <a href="#">GPC3</a> | glypican 3       |
| <a href="#">Details</a> | 3           | 67           | hsa-miR-96      | <a href="#">GPC3</a> | glypican 3       |
| <a href="#">Details</a> | 4           | 59           | hsa-miR-570     | <a href="#">GPC3</a> | glypican 3       |

A

GPC3 3'UTR

```

... 240 ..... 250 ..... 260 .....
Hsa ACCAUCAAGUUGGCCAAAUUA -UUCUCCUAUG
Ptr ACCAUCAAGUUGGCCAAAUUAUUUCCUAUG
Mml ACCAUCAAGUUGGCCAAAUUA -UUUCCUAUG
Mmu ACCUUCAAGUUGGCCAAAUUA -UUUUCUACA
Rno AAUUUCAAGUUGGCCAAAUUA -UUUUCUACA
Cpo - - - - CAAGUUGGCCAAAUUA -UUUCCUAUG
Ocu - - - AUCAACUUGGCCAAAUUA -UUUCCUAUG
Eeu - - - - - - - - GUGCCAAAUUA -UUUUCUUAUG
Cfa - - - CUCAAGUUGGCCAAAUUA -UUUCCUAUG
Fca ACACUCAAGUUGGCCAAAUUA -UUUCCUAUG
Eca - - - -UCAAGCUGUGUCAAAAUUA -UUUCCUAUG
Bta - - - -UCAAAUUGGCCAAAUUA -UUUCCUAUG
Dno - - - -AAAGUUGGCCAAAUUA -UUUCCUAUG
Laf - - - -UCAAGUUGGCCAAAUUA -UUUCCUGUG
    
```

miR-96 site

```

... 240 ..... 250 ..... 260 .....
Hsa ACCAUCAAGUUGGCCAAAUUA -UUCUCCUAUG
Ptr ACCAUCAAGUUGGCCAAAUUAUUUCCUAUG
Mml ACCAUCAAGUUGGCCAAAUUA -UUUCCUAUG
Mmu ACCUUCAAGUUGGCCAAAUUA -UUUUCUACA
Rno AAUUUCAAGUUGGCCAAAUUA -UUUUCUACA
Cpo - - - - CAAGUUGGCCAAAUUA -UUUCCUAUG
Ocu - - - AUCAACUUGGCCAAAUUA -UUUCCUAUG
Eeu - - - - - - - - GUGCCAAAUUA -UUUUCUUAUG
Cfa - - - CUCAAGUUGGCCAAAUUA -UUUCCUAUG
Fca ACACUCAAGUUGGCCAAAUUA -UUUCCUAUG
Eca - - - -UCAAGCUGUGUCAAAAUUA -UUUCCUAUG
Bta - - - -UCAAAUUGGCCAAAUUA -UUUCCUAUG
Dno - - - -AAAGUUGGCCAAAUUA -UUUCCUAUG
Laf - - - -UCAAGUUGGCCAAAUUA -UUUCCUGUG
    
```

miR-182 site

B

| Cells  | RNA 18s CT | miR-182 CT | miR-96 CT | $\Delta$ CT miR-182 | $\Delta$ CT miR-96 |
|--------|------------|------------|-----------|---------------------|--------------------|
| HuH7   | 6,7        | 27,7       | 33,7      | -21                 | -27                |
| SNU398 | 6,4        | 26,3       | 32,1      | -19,9               | -25,7              |

C

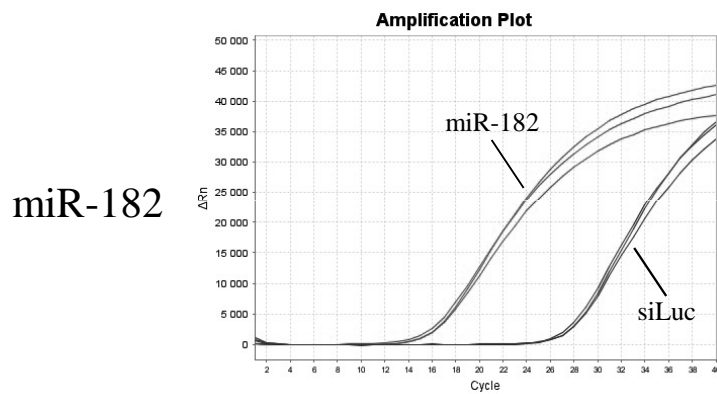

D

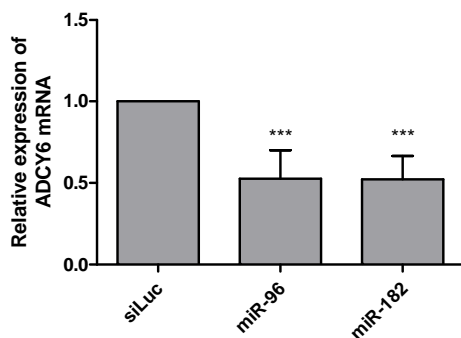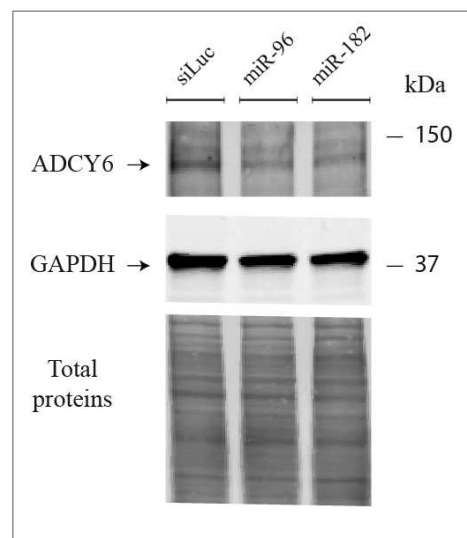

Jalvy S et al, Supplementary Figure S2

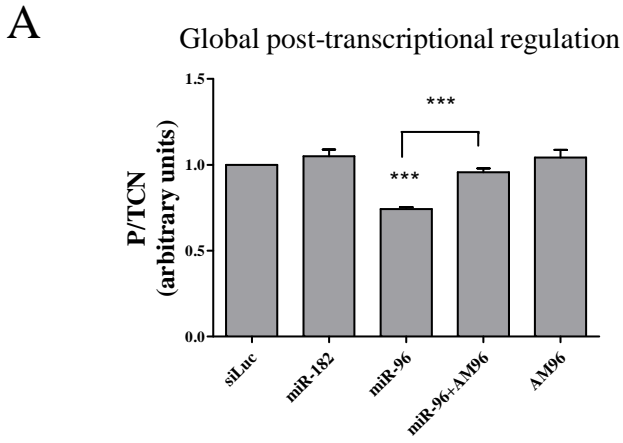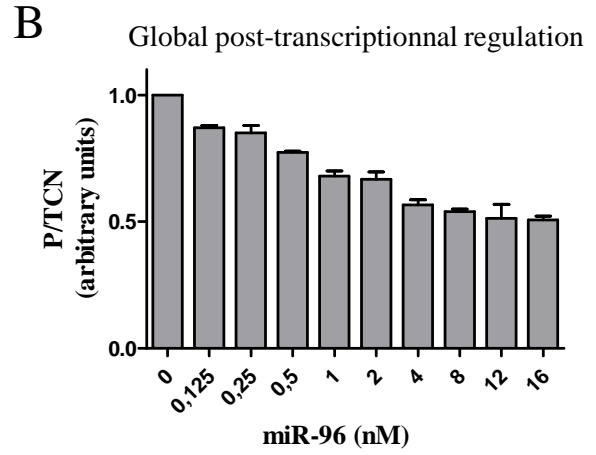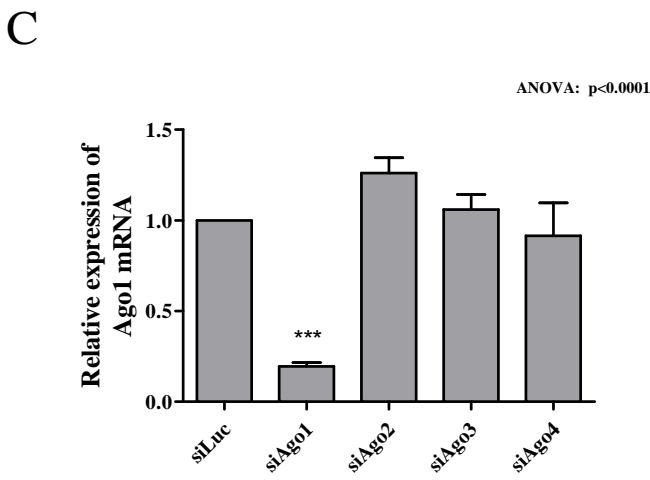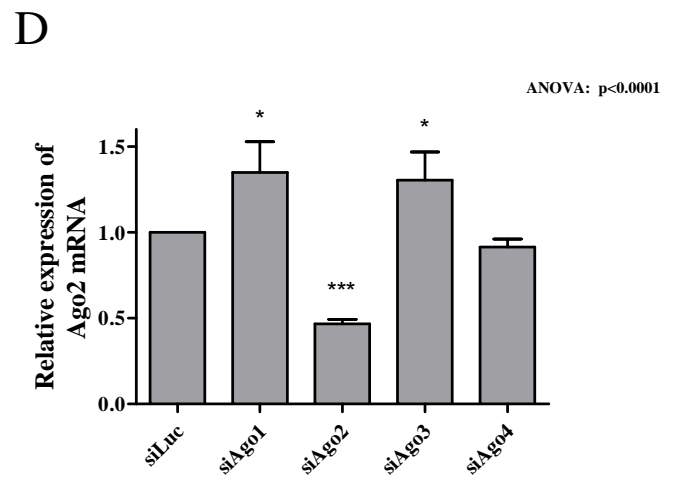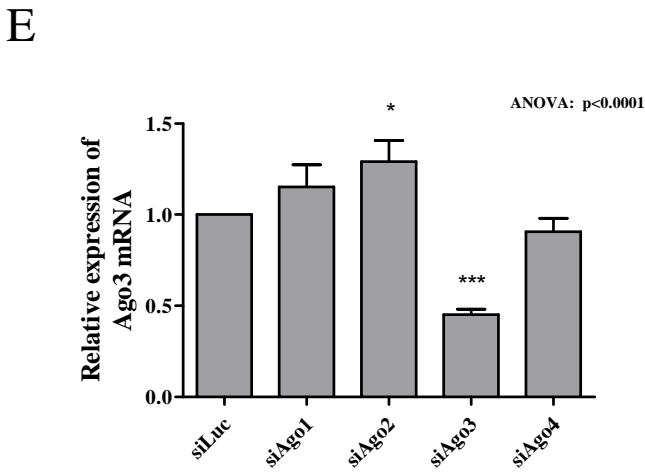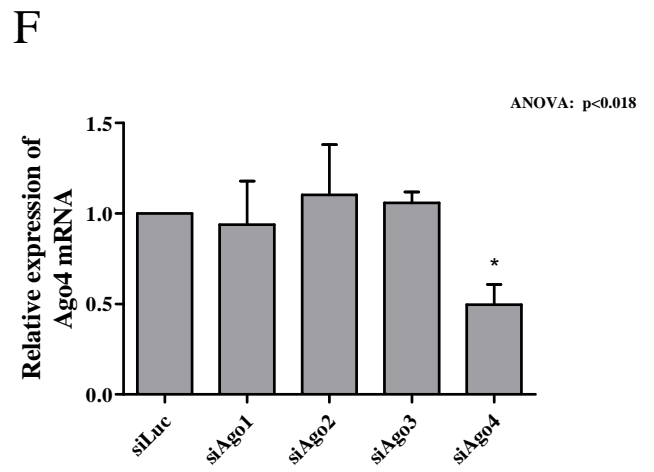

Jalvy S et al, Supplementary Figure S3

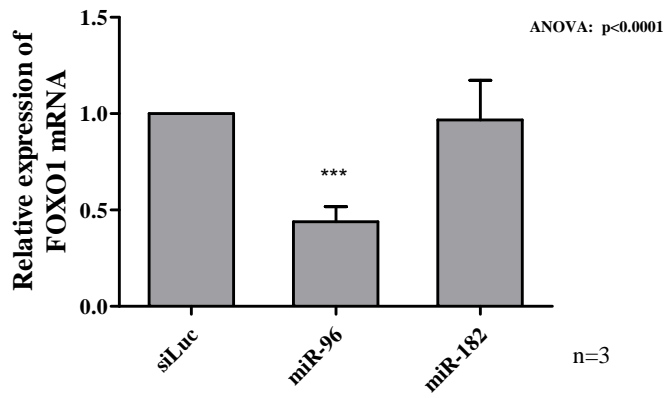

Jalvy S et al, Supplementary Figure S4
